# Quantifying the impact of genetically regulated expression on complex traits and diseases

Mingxuan Cai<sup>1</sup>, Lin Chen<sup>2</sup>, Jin Liu<sup>3\*</sup>& Can Yang<sup>1\*</sup>

<sup>1</sup>Department of Mathematics, The Hong Kong University of Science and Technology

<sup>1</sup>Department of Public Health Sciences, The University of Chicago

<sup>3</sup>Center for Quantitative Medicine, Duke-NUS Medical School

1 About 90% of risk variants identified from genome-wide association studies (GWAS) are located  
2 in non-coding regions, highlighting the regulatory role of genetic variants. We propose a unified  
3 statistical framework, IGREX, for quantifying the impact of genetically regulated expression  
4 (GREX). This is achieved by estimating proportion of phenotypic variations that can be  
5 explained by the GREX component. IGREX only requires summary-level GWAS data and  
6 a gene expression reference panel as input. In real data analysis, using 48 tissues from the  
7 GTEx project as the reference panel, we applied IGREX to a wide spectrum of phenotypes  
8 in GWAS, and observed a significant proportion of phenotypic variations could be attributed  
9 to the GREX component. In particular, the results given by IGREX revealed tissue-across  
10 and tissue-specific patterns of the GREX effects. We also observed strong association between  
11 GREX effect and immune-related proteins, further supporting the relevance between GREX  
12 and the immune processes.

---

\*Correspondence should be addressed to Jin Liu ([jin.liu@duke-nus.edu.sg](mailto:jin.liu@duke-nus.edu.sg)) and Can Yang ([macyang@ust.hk](mailto:macyang@ust.hk))

13

14 Over the last decade, genome-wide association studies (GWASs) have successfully identified  
15 about 90,000 significant associations ( $p$ -value  $< 5 \times 10^{-8}$ ) between single-nucleotide polymor-  
16 phisms (SNPs) and a wide range of complex traits/diseases (<http://www.ebi.ac.uk/gwas/>).  
17 Nevertheless, more than 90% of identified risk variants are located in non-coding regions [1],  
18 leading to difficulties in understanding the biological basis of GWAS findings. Increasing  
19 evidence [2, 3, 4, 5, 6, 7, 8] suggests that the path from genotypes to phenotypes involves  
20 gene regulatory mechanisms. For example, a study of 18 complex traits revealed significant  
21 enrichment for expression quantitative trait loci (eQTLs) in 11% of 729 tissue-trait pairs [9],  
22 implying the pervasive involvement of regulation effects in a wide spectrum of human traits.  
23 These observations lead to a scientific hypothesis that a vast proportion of genetic variants  
24 affect phenotypes by regulating the gene expression levels. To test this hypothesis, there is a  
25 need to comprehensively characterize the role of genetically regulated gene expression (GREX)  
26 in human genetics.

27 Fortunately, the advent of cellular-level data generated by genomic consortia provides an  
28 unprecedented chance to study the behavior of GREX effects. For example, the current V7  
29 release of the Genotype-Tissue Expression (GTEx) project (<https://gtexportal.org/home/>)  
30 has collected gene expression samples from 53 non-diseased tissues across 714 individuals  
31 generated by Illumina Sequencing platforms [10], allowing for tissue-specific analysis. Multiple  
32 blood eQTL resources comprising thousands of individuals are made available for open access  
33 [11, 12]; other ongoing projects such as Genetics of DNA Methylation Consortium (GoDMC)  
34 and eQTLGen consortium are collecting expression data with sample size larger than 10,000  
35 [13], serving as promising resources for comprehensive analysis.

36 The availability of these data sets along with GWAS data enables an integrative framework  
37 for studying the GREX effects: the gene expressions of the GWAS cohort can be first ‘imputed’  
38 based on statistical models fitted using a reference panel (e.g. GTEx) and then related to  
39 phenotypes [14, 15, 16, 17, 18, 19, 20, 21, 22]. This framework enjoys several benefits. First, it  
40 does not require the availability of gene expression information for GWAS data, which makes it  
41 applicable to a wide spectrum of phenotypes. Second, the prediction process naturally filters  
42 out the environmental noise and confounding variations that are ubiquitous in gene expression  
43 measurement, allowing the analysis to be focused on GREX effects. Third, the reverse influence

44 on gene expression caused by phenotypic variation is eliminated. However, the DNA variations  
45 (i.e., SNPs) and gene expression available from the reference panel (e.g., GTEx) are often  
46 collected from non-diseased individuals for general use. Therefore, the integrative analysis  
47 of general-purposed expression data with GWAS data of a specific phenotype depends on an  
48 assumption: there exists a steady-state component in gene expression regulated by genetic  
49 variants, and the variation of this steady-state component can further induce phenotypic  
50 variations. Based on this assumption, multiple statistical models have been proposed to test  
51 the association between a given phenotype and the ‘imputed’ gene expression [8, 23]. Examples  
52 include PrediXcan [14], TWAS [15], FOCUS [17], MetaXcan [19] and CoMM [20].

53 While all the above methods can localize gene-trait associations based on the predicted  
54 gene expression, how much of the variance of a phenotype can be attributed to GREX remains  
55 unknown. As heritability of a phenotype that is defined as the proportion of phenotypic  
56 variance explained by DNA variations is often used to quantify the overall genetic effects, it is  
57 of great interest to characterize the impact of gene regulation on phenotypic variation from a  
58 global perspective. For example, how much of the phenotypic variations at the cellular level  
59 (e.g., glucose) and the organismal level (e.g., height) can be attributed to GREX? Are there any  
60 cross-tissue patterns or tissue-specific characteristics of GREX in different levels of phenotypes?  
61 To the best of our knowledge, there are two literatures that have attempted to address part of  
62 these problems [21, 22]. The first method (RhoGE) [21] estimates the proportion of phenotypic  
63 variation explained by GREX based on the idea of linkage-disequilibrium (LD) score regression  
64 (LDSC) [24]. Since it ignores the uncertainty in predicting gene expression, the proportion of  
65 variance explained by GREX could be substantially under-estimated. Another method, known  
66 as gene expression co-score regression (GECS) [22], have very stringent requirements that the  
67 analyzed SNPs are not in LD to ensure unbiasedness, which greatly limits its application in  
68 real data analysis.

69 In this article, we propose a unified framework, named IGREX, for quantifying the impact of  
70 genetically regulated expression, while accounting for uncertainty in predicted gene expression  
71 under weak signal. IGREX only requires summary-level GWAS data as its input, greatly  
72 enhancing the applicability of the model to a wide range of phenotypes. We investigated the  
73 performance of IGREX with comprehensive simulation, which highlights the importance of  
74 accounting for uncertainty. Then, using 48 tissues from the GTEx project as the reference panel,

75 we applied IGREX to both individual-level and summary-level GWAS data sets comprised  
76 of various cellular and organismal phenotypes. Our results provide new biological insights  
77 regarding the function of gene expression in the genetic architecture of complex traits. We also  
78 demonstrate the reproducibility using independent datasets.

## 79 Results

80 **Method overview.** IGREX is a two-stage method that first evaluates the posterior distribution  
81 of GREX effects from a gene expression reference panel and then estimates the proportion of  
82 variance explained by GREX using the ‘predicted’ gene expression of GWAS data. It can be  
83 applied to both individual-level (IGREX-i) and summary-level (IGREX-s) GWAS data. Here,  
84 we briefly introduce the statistical formulation of IGREX-i and leave the technical details in  
85 the Methods Section.

86 Suppose we have the reference eQTL data set  $\mathcal{D}_r$  and individual-level GWAS data set  $\mathcal{D}_i$ :  
87  $\mathcal{D}_r = \{\mathbf{Y}, \mathbf{X}_r\}$  is comprised of  $n_r \times G$  gene expression matrix  $\mathbf{Y}$  and  $n_r \times M$  genotype matrix  
88  $\mathbf{X}_r$ , where  $G$  is the number of genes,  $M$  is the number of SNPs and  $n_r$  is the sample size;  
89  $\mathcal{D}_i = \{\mathbf{t}, \mathbf{X}\}$  contains a phenotype vector  $\mathbf{t} \in \mathbb{R}^n$  and a genotype matrix  $\mathbf{X} \in \mathbb{R}^{n \times M}$ , where  $n$  is  
90 the GWAS sample size. We first link each gene expression to its local SNPs by the following  
91 linear model:

$$\mathbf{y}_g = \mathbf{X}_{r,g}\boldsymbol{\beta}_g + \mathbf{e}_{r,g}, \quad (1)$$

92 where the subscript  $_g$  represents the  $g$ -th gene,  $\boldsymbol{\beta}_g \sim \mathcal{N}(\mathbf{0}, \sigma_{\beta_g}^2 \mathbf{I}_{M_g})$  is the genetic effects of  $M_g$   
93 local SNP,  $\mathbf{e}_{r,g} \sim \mathcal{N}(0, \sigma_{r,g}^2 \mathbf{I}_{n_r})$  is the independent noise, and the local SNPs are defined as  
94 SNPs around the target gene (e.g.  $\pm 1$  Mb around the transcription start site). Because we  
95 are interested in the steady-state component of gene expression regulated by genetic variants,  
96  $\boldsymbol{\beta}_g$  is assumed to be the same for individuals in both  $\mathcal{D}_r$  and  $\mathcal{D}_i$ . Consequently, the GREX of  
97 individuals in GWAS data can be evaluated by  $\mathbf{X}_g\boldsymbol{\beta}_g$ . Next, we assume that the genetic effects  
98 on  $\mathbf{t}$  can be decomposed into two parts, i.e. the genetic effect through GREX and the genetic  
99 effect through alternative ways:

$$\mathbf{t} = \sum_{g=1}^G \alpha_g \mathbf{X}_g \boldsymbol{\beta}_g + \mathbf{X}\boldsymbol{\gamma} + \boldsymbol{\epsilon}, \quad (2)$$

100 where  $\alpha_g \sim \mathcal{N}(0, \sigma_\alpha^2)$  is the effect size of  $\mathbf{X}_g\boldsymbol{\beta}_g$  on  $\mathbf{t}$ ,  $\boldsymbol{\gamma} \sim \mathcal{N}(\mathbf{0}, \sigma_\gamma^2 \mathbf{I}_M)$  is the alternative  
101 genetic effects vector of length  $M$  and  $\boldsymbol{\epsilon} \sim \mathcal{N}(0, \sigma_\epsilon^2 \mathbf{I}_n)$  is the independent noise. In this model,

102  $\sum_{g=1}^G \alpha_g \mathbf{X}_g \boldsymbol{\beta}_g$  and  $\mathbf{X}\boldsymbol{\gamma}$  correspond to the overall impact of the GREX component and the  
 103 alternative component on  $\mathbf{t}$ , respectively. Thus, given a genotype vector  $\mathbf{x}$  and a phenotype  $t$ ,  
 104 the impact of GREX can be quantified by the proportion of variance explained by the GREX  
 105 component:  $\text{PVE}_{\text{GREX}} = \frac{\text{Var}(\sum_{g=1}^G \alpha_g \mathbf{x}_g^T \boldsymbol{\beta}_g)}{\text{Var}(t)}$ . To estimate this quantity, the inference procedure of  
 106 IGREX is decomposed into two stages. At the first stage, we estimate  $\sigma_{\beta_g}^2$  and  $\sigma_{r,g}^2$  using a fast  
 107 algorithm and evaluate the posterior distribution  $\boldsymbol{\beta}_g | \mathbf{y}_g, \mathbf{X}_{r,g} \sim \mathcal{N}(\boldsymbol{\mu}_g, \boldsymbol{\Sigma}_g)$  for all genes. At  
 108 the second stage, by treating the posterior obtained in the stage one as the prior distribution  
 109 of  $\boldsymbol{\beta}_g$  in model (2), we can obtain estimated values of  $\sigma_\alpha^2$ ,  $\sigma_\gamma^2$  and  $\sigma_\epsilon^2$  using either method of  
 110 moments (MoM) or restricted maximum likelihood (REML). Following this procedure, the  
 111 resulting estimate of  $\text{PVE}_{\text{GREX}}$  is obtained (with details given in the Methods Section) by

$$\widehat{\text{PVE}}_{\text{GREX}} = \frac{\text{tr}(\sum_{g=1}^G \hat{\sigma}_\alpha^2 \mathbf{X}_g (\boldsymbol{\mu}_g \boldsymbol{\mu}_g^T + \boldsymbol{\Sigma}_g) \mathbf{X}_g^T)}{\text{tr}(\sum_{g=1}^G \hat{\sigma}_\alpha^2 \mathbf{X}_g (\boldsymbol{\mu}_g \boldsymbol{\mu}_g^T + \boldsymbol{\Sigma}_g) \mathbf{X}_g^T + \hat{\sigma}_\gamma^2 \mathbf{X}_g \mathbf{X}_g^T + \hat{\sigma}_\epsilon^2 \mathbf{I}_n)},$$

112 where the parameters with hat represent their corresponding estimates. As we can observe  
 113 from the above estimation, the substitution of posterior  $\boldsymbol{\beta}_g | \mathbf{y}_g, \mathbf{X}_{r,g}$  naturally results in the  
 114 adjustment of uncertainty associated with  $\boldsymbol{\beta}_g$ , which is quantified by the posterior variance  
 115  $\boldsymbol{\Sigma}_g$ . Besides the point estimate, the standard error of  $\widehat{\text{PVE}}_{\text{GREX}}$  can be obtained by the delta  
 116 method (see Supplementary Note).

117 In real applications, individual-level GWAS data may not be accessible. Hence, we have  
 118 further developed IGREX-s for handling summary-level GWAS data (See Methods). Based  
 119 on the MoM, IGREX-s can well approximate IGREX-i while requiring only the  $z$ -scores of  
 120 SNPs and a reference genotype matrix  $\tilde{\mathbf{X}} \in \mathbb{R}^{m \times M}$  of a similar LD pattern with  $\mathbf{X}$ , where the  
 121 sample size  $m$  can be as small as a few hundreds. In practice,  $\tilde{\mathbf{X}}$  can be a random subsample  
 122 of individuals in  $\mathbf{X}$  or a reference panel of the same ethnic origin. The estimate of  $\text{PVE}_{\text{GREX}}$   
 123 given by IGREX-s is

$$\widehat{\text{PVE}}_{\text{GREX}} = \frac{\hat{\sigma}_\alpha^2}{\hat{\sigma}_t^2} \text{tr}(\sum_{g=1}^G (\boldsymbol{\mu}_g \boldsymbol{\mu}_g^T + \boldsymbol{\Sigma}_g) \hat{\mathbf{R}}_g),$$

124 where  $\hat{\mathbf{R}}_g = \tilde{\mathbf{X}}_g^T \tilde{\mathbf{X}}_g / m$  is the estimated LD matrix associated with the  $g$ -th gene and  $\tilde{\mathbf{X}}_g$  is  
 125 the corresponding columns of  $\tilde{\mathbf{X}}$ . Our method IGREX also allows to incorporate sex, age and  
 126 principal components as covariates to minimize the influence of confounding factors (See details  
 127 in Supplementary Note).

128 **Simulation.** We conducted comprehensive simulation studies to evaluate the performance of  
 129 IGREX. For all the simulated data, we fixed  $n = 4,000$ ,  $G = 200$ ,  $M = 20,000$  (i.e. 100 SNPs

130 in each gene). The total phenotypic heritability was set as  $h_t^2 = \frac{\text{Var}(\sum_{g=1}^G \alpha_g \mathbf{x}_g^T \boldsymbol{\beta}_g + \mathbf{x}^T \boldsymbol{\beta}_g)}{\text{Var}(t)} = 0.5$ ,  
131 where  $\text{PVE}_{\text{GREX}} = 0.2$  and  $\text{PVE}_{\text{Alternative}} = \frac{\text{Var}(\mathbf{x}_g^T \boldsymbol{\gamma})}{\text{Var}(t)} = 0.3$  (results for other scenarios are shown  
132 in Supplementary Figs. 1-3). To simulate the genotype data, we first sampled the minor  
133 allele frequencies (MAF) from uniform distribution  $\mathcal{U}(0.05, 0.5)$  and data matrices from normal  
134 distribution  $\mathcal{N}(\mathbf{0}, \Sigma(\rho))$ , where  $\Sigma_{jj'} = \rho^{|j-j'|}$  characterizes the LD patterns between SNPs.  
135 Then, the genotype matrices  $\mathbf{X}_r$  and  $\mathbf{X}$  were obtained by categorizing the entries of generated  
136 data matrices into 0, 1, 2 according to MAF. Given the genotype matrices, the gene expression  
137  $\mathbf{y}_g$  and phenotype  $\mathbf{t}$  were simulated following the generative models (1) and (2). To assess  
138 IGREX-s, we calculated the  $z$ -score of each SNP and randomly subsetted  $m = 500$  rows from  
139  $\mathbf{X}$  for estimating LD matrix  $\hat{\mathbf{R}}_g$  (results for other settings of  $m$  are shown in Supplementary  
140 Fig. 4).

141 We first evaluated the estimation performance of IGREX for different settings of eQTL  
142 reference data. Specifically, we varied  $n_r$  at  $\{800, 1000, 2000\}$ ,  $\text{PVE}_y = \frac{\text{Var}(\mathbf{x}^T \boldsymbol{\beta}_g)}{\text{Var}(\mathbf{y}_g)}$  at  $\{0.1, 0.2, 0.3\}$ ,  
143 where  $\text{PVE}_y$  quantifies the gene expression heritability explained by its local SNPs. To mimic  
144 the situation that uncertainty was incorrectly ignored, we obtained the posterior mean of  $\boldsymbol{\beta}_g$  in  
145 the first stage, and replaced the true effect size  $\boldsymbol{\beta}_g$  by its posterior mean  $\boldsymbol{\mu}_g$  while specified  
146 posterior variance  $\boldsymbol{\Sigma}_g = \mathbf{0}$  at the second stage, and then conducted REML and MoM as before.  
147 We denote these methods as  $\text{REML}_0$  and  $\text{MoM}_0$ . The simulation results summarized in Fig.  
148 1a show that both  $\text{PVE}_{\text{GREX}}$  and  $\text{PVE}_{\text{Alternative}}$  are accurately estimated using REML-based  
149 IGREX-i under all circumstances. The MoM-based IGREX-i slightly underestimates  $\text{PVE}_{\text{GREX}}$   
150 when both sample size  $n_r$  and signal strength  $\text{PVE}_y$  are very small, but steadily converges to  
151 the same performance of REML as either  $n_r$  or  $\text{PVE}_y$  increases. For all settings, IGREX-s  
152 well approximates MoM, producing almost identical estimations. In contrast, as both  $\text{REML}_0$   
153 and  $\text{MoM}_0$  do not account for uncertainty arising in the first stage, they have poor estimation  
154 performance even with very large sample size and very strong signal in our simulation study.

155 Next, we conducted simulations to evaluate the situation that the IGREX model was  
156 mis-specified. First, we considered the situation where genetic effects  $\boldsymbol{\beta}_g$  and  $\boldsymbol{\alpha}$  were sparse.  
157 To evaluate the influence of different sparsity patterns on our method, we first fixed the  
158 proportion of non-zero effects  $\pi_\alpha = (\text{NO. of nonzero entries in } \boldsymbol{\alpha})/G$  at 0.2 and varied  $\pi_\beta =$   
159  $(\text{NO. of nonzero entries in } \boldsymbol{\beta}_g)/M_g$  at  $\{0.2, 0.5, 0.8\}$ , then we fixed  $\pi_\beta = 0.2$  and varied  $\pi_\alpha$  at  
160  $\{0.2, 0.5, 0.8\}$ . As shown in Figs. 1b-c, all three methods of IGREX produce accurate estimates

161 in the presence of sparse genetic effects, implying the robustness of IGREX to model mis-  
162 specification. Besides, the estimation performances are not influenced by the degree of sparsity.  
163 Second, we investigated the influence of LD pattern by setting  $\rho$  varied at  $\{0.1, 0.3, 0.5, 0.8\}$ .  
164 From Fig. 1d., we can observe that IGREX produces accurate estimations despite the magnitude  
165 of LD. On the other hand, REML<sub>0</sub> and MoM<sub>0</sub> consistently underestimate  $PVE_{GREX}$  as a result  
166 of ignoring estimation uncertainty.

167 In addition, we made comparisons between IGREX and the method proposed in RhoGE  
168 [21], which provides an LDSC-based approach for estimating  $PVE_{GREX}$ . However, this model  
169 does not adjust for estimation uncertainty. The results are shown in Fig. 1e. As we can  
170 expect, the pattern of IGREX is consistent with that in Fig. 1a. On the other hand, RhoGE  
171 substantially underestimates  $PVE_{GREX}$  for most cases despite the reference sample size. It  
172 only achieves the same accuracy as IGREX when the signal strength  $PVE_y \geq 0.9$ , which is not  
173 realistic for eQTL data.

174 **Real data application on individual-level GWAS data.** We applied our approaches to  
175 two individual-level GWAS datasets, the Northern Finland Birth Cohorts program 1966 (NFBC)  
176 [25] and the Wellcome Trust Case Control Consortium (WTCCC) [26], with eQTL data from  
177 48 human tissues in GTEx project. The details of the datasets and the data preprocessing  
178 procedures are described in the Methods Section.

179 After sample quality control of the NFBC dataset, we have ten quantitative traits from  
180 5,123 individuals with 309,245 SNPs. We first estimated the heritabilities of the ten traits and  
181 then excluded four traits of very small heritabilities including body mass index (BMI), C-reactive  
182 protein (CRP), insulin and diastolic blood pressure (DiaBP) and restricted our analysis within  
183 the remaining six traits with high heritabilities: high-density lipoprotein cholesterol (HDL),  
184 low-density lipoprotein cholesterol (LDL), triglycerides (TG), total cholesterol (TC) and systolic  
185 blood pressure (SysBP). Figs. 2a-b show the  $\widehat{PVE}_{GREX}$  of the six traits on 48 GTEx tissues  
186 obtained using REML and MoM, respectively. We can observe that the two methods produced  
187 quite similar estimates in most of the tissues. Although the REML estimates are slightly  
188 higher than the MoM estimates in some cases, the discrepancy is not significant. Of the  
189 outcomes shown in the figures, LDL and TC deserve special attention: both of them have a  
190 large proportion of variations can be explained by the GREX component in liver. According  
191 to the REML approach (Fig. 2a), the  $\widehat{PVE}_{GREX}$  for LDL in liver is as high as 14.3% (with

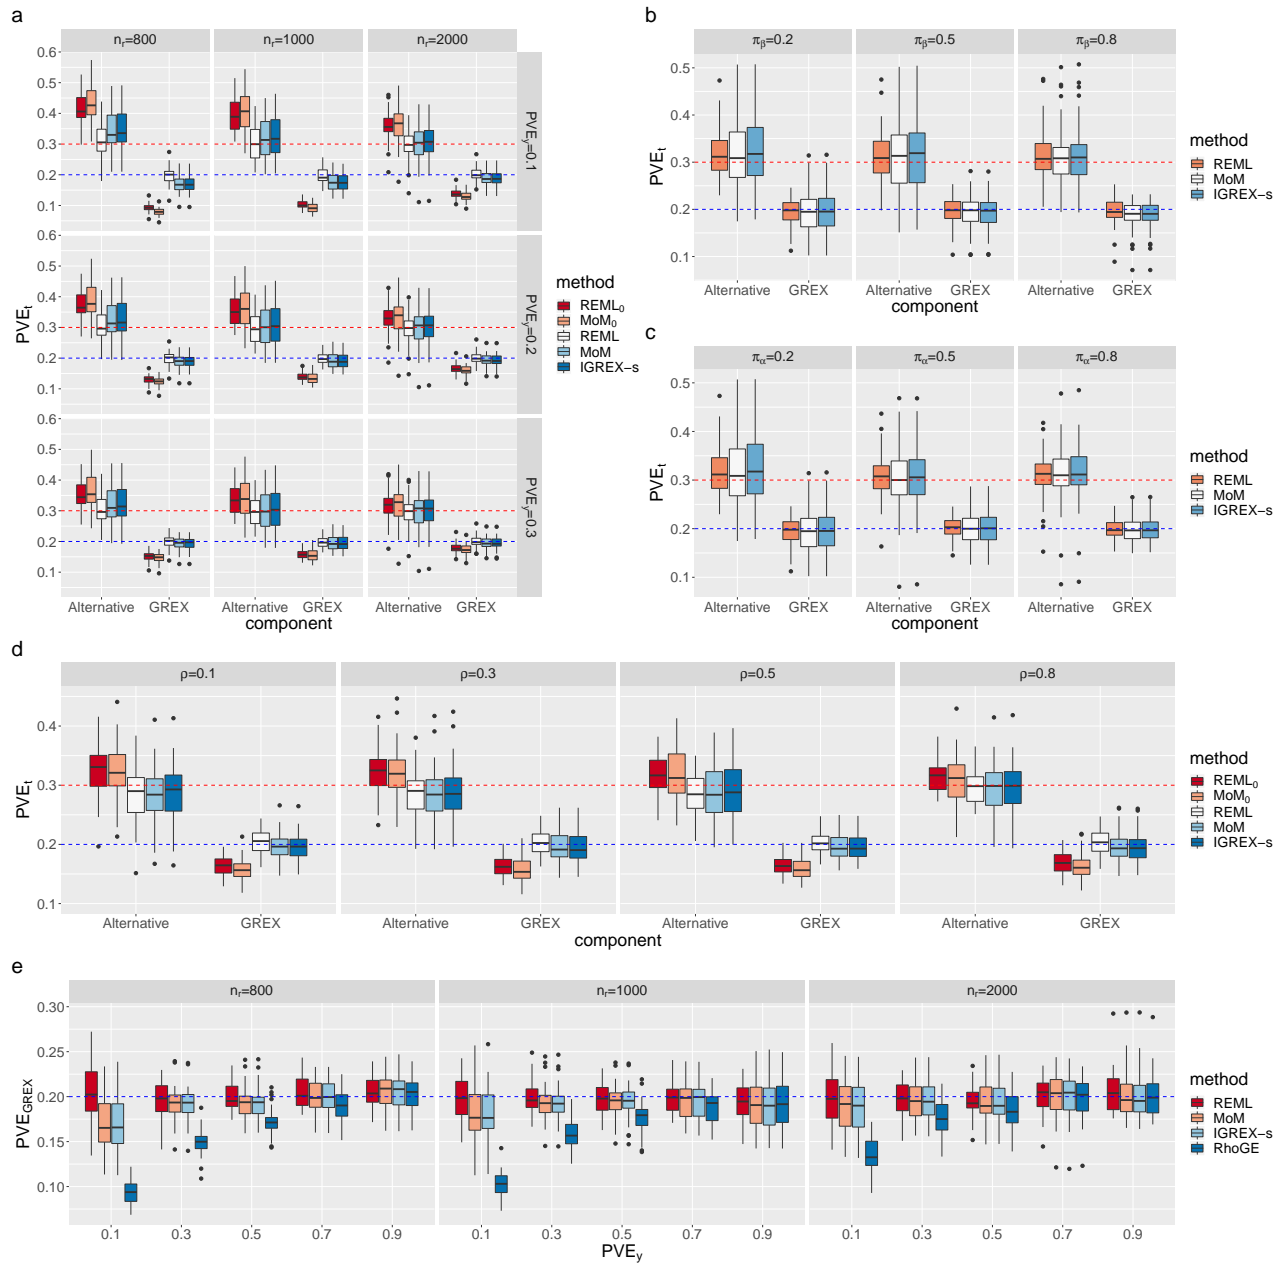

Figure 1: Simulation studies to compare estimation accuracies of IGREX with other methods. REML and MoM in the legend are abbreviations of methods on which IGREX-i is based. The blue and red dashed lines represent the true values of  $PVE_{GREX}$  and  $PVE_{Alternative}$ , respectively. We conducted 30 replications and generated box plots for analyzing the estimation performance of: **a** the three models of IGREX, REML<sub>0</sub> and MoM<sub>0</sub> when  $n_r$  was varied at  $\{800, 1000, 2000\}$  and  $PVE_y$  was varied at  $\{0.1, 0.2, 0.3\}$ ; **b** the three models of IGREX when  $\pi_\alpha = 0.2$  and  $\pi_\beta$  was varied at  $\{0.2, 0.5, 0.8\}$ ; **c** the three models of IGREX when  $\pi_\beta = 0.2$  and  $\pi_\alpha$  is varied at  $\{0.2, 0.5, 0.8\}$ ; **d** the three models of IGREX, REML<sub>0</sub> and MoM<sub>0</sub> when  $\rho$  is varied at  $\{0.1, 0.3, 0.5, 0.8\}$ ; **e** the three models of IGREX and RhoGE when  $n_r$  is varied at  $\{800, 1000, 2000\}$ .

192 standard error 2.6%), capturing 52.6% of total heritability defined as  $PVE_{GREX}/h^2$ ; TC also has  
 193 high  $\widehat{PVE}_{GREX} = 13.7\%$  (with standard error 2.5%), which captures 79.4% of total heritability



194 (see Supplementary Fig. 6). These results are verified by the MoM (Fig. 2b). In fact, LDL  
195 synthesized in liver is an important lipoprotein particle for transporting cholesterol in the  
196 blood. Our finding suggests that the genetic architecture of LDL synthesis in liver extensively  
197 involves the gene regulation mechanism, which provides a new insight of this biological process.  
198 Additionally, we analyzed the impact of ignoring the uncertainty (with the complete results  
199 given in the Supplementary Fig. 5). By observing the slopes of fitted regression lines in Figs.  
200 2c-d, it is clear that half of  $\widehat{\text{PVE}}_{\text{GREX}}$  is lost because of ignoring the uncertainty. To evaluate  
201 the performance of IGREX-s, we also generated  $z$ -scores from NFBC data and applied IGREX-s  
202 based on the summary statistics. The resulting estimates are then compared to MoM estimates  
203 in Fig. 2e. For all six traits, IGREX-s estimates well approximate the MoM estimates using  
204 the individual level data, which is consistent with our simulation result.

205 Now we investigate the role of GREX in complex human traits and diseases, using the  
206 WTCCC dataset [26]. We applied IGREX to estimate the  $\text{PVE}_{\text{GREX}}$  of seven diseases including  
207 bipolar disorder (BD), coronary artery disease (CAD), Crohn's disease (CD), hypertension  
208 (HT), rheumatoid arthritis (RA), type 1 diabetes (T1D) and type 2 diabetes (T2D). For  
209 diseases, we analyzed percentage of heritability explained by GREX ( $\text{PVE}_{\text{GREX}}/h^2$ ) to avoid  
210 the influence of ascertainment bias. The estimated  $\text{PVE}_{\text{GREX}}/h^2$  obtained by REML are shown  
211 in Supplementary Fig. 8. The results show that all the diseases have moderate to high estimated  
212  $\text{PVE}_{\text{GREX}}/h^2$  in some subsets of the tissues. The top  $\text{PVE}_{\text{GREX}}/h^2$ 's are 12.8% for BD in  
213 amygdala, 21.2% for CAD in spinal cord, 18.4% for CD in amygdala, 16.7% for HT in spleen  
214 and 17.9% for T2D in anterior cingulate cortex. Two diseases that deserve special attention  
215 are RA and T1D, whose average  $\text{PVE}_{\text{GREX}}/h^2$  estimates are as high as 34.1% and 71.2%,  
216 respectively. It is well known that RA and T1D are both autoimmune diseases whose strong  
217 associations with major histocompatibility complex (MHC) region have been well established in  
218 previous studies [26, 27]. To have a better understanding of our observations, we compared the  
219 estimated  $\text{PVE}_{\text{GREX}}/h^2$  with those obtained by removing the MHC region (results are given  
220 in the Supplementary Fig. 9). The distributions of  $\text{PVE}_{\text{GREX}}/h^2$  estimates are shown in Fig.  
221 3a. We observed a substantial downward shift of the distribution after removing the MHC  
222 region in RA and T1D: the mean  $\widehat{\text{PVE}}_{\text{GREX}}$  dropped from 34.1% to 7.6% for RA and from  
223 71.2% to 11.7% for T1D. In addition, the tissue-specific comparisons shown in Fig. 3b reveal  
224 an extensive reduction of  $\text{PVE}_{\text{GREX}}$  in all tissues for T1D and RA, while such change does

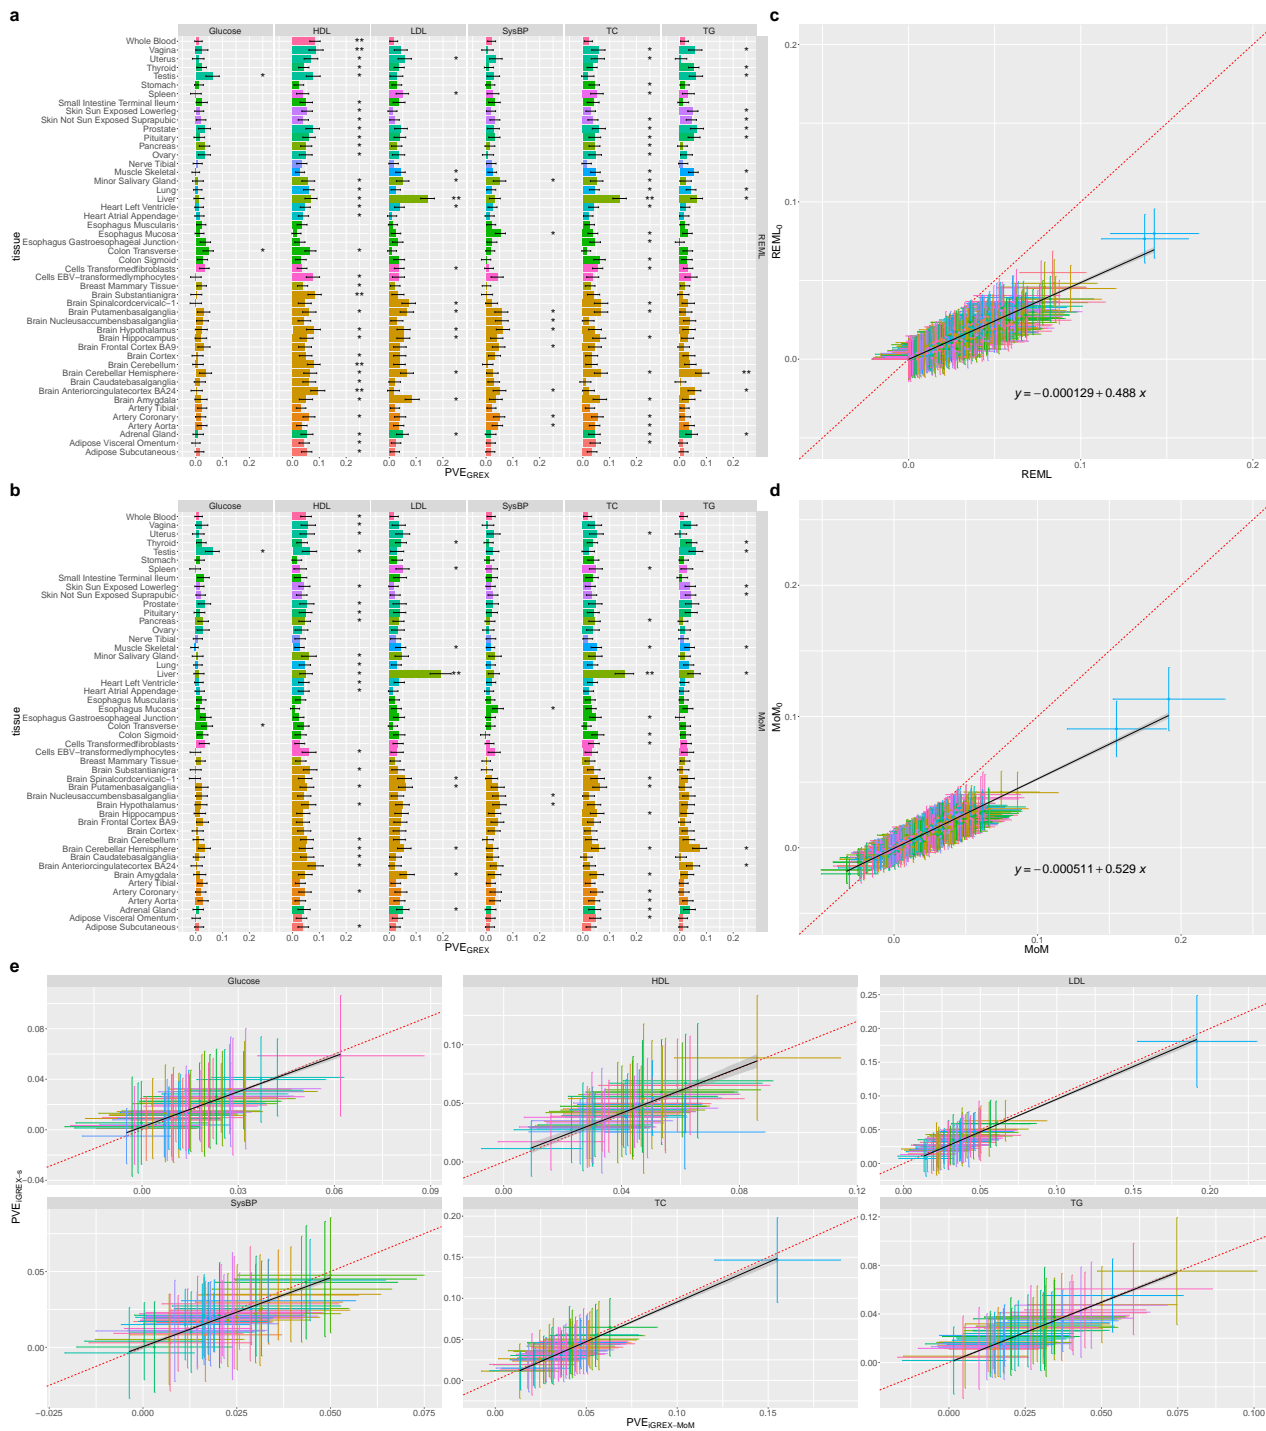

Figure 2: Tissue-specific  $\widehat{PVE}_{GREX}$  of the six traits from NFBC data set. (a-b)  $\widehat{PVE}_{GREX}$  obtained by REML and MoM. Tissues are colored according to their categories. The number of asterisks represents the significance level:  $p$ -value  $< 0.05$  is annotated by \*;  $p$ -value  $< 0.05/48$  is annotated by \*\*. (c-d) All pairs of estimates generated by REML and MoM against their counterparts without accounting for uncertainty. A regression line is fitted and the estimated coefficients are given in the plot. (e) Each panel is a plot of  $\widehat{PVE}_{GREX}$  generated by IGREX-s against those generated by MoM for all 48 tissues in one of the six traits.

225 not appear in other traits. This finding implies that the steady-state gene regulation process  
 226 pervasively participates in the immune functionality of the MHC region for RA and T1D. We  
 227 note that this discovery reveals a potential rationale behind the etiologies of the MHC-related  
 228 autoimmune diseases such as RA and T1D.

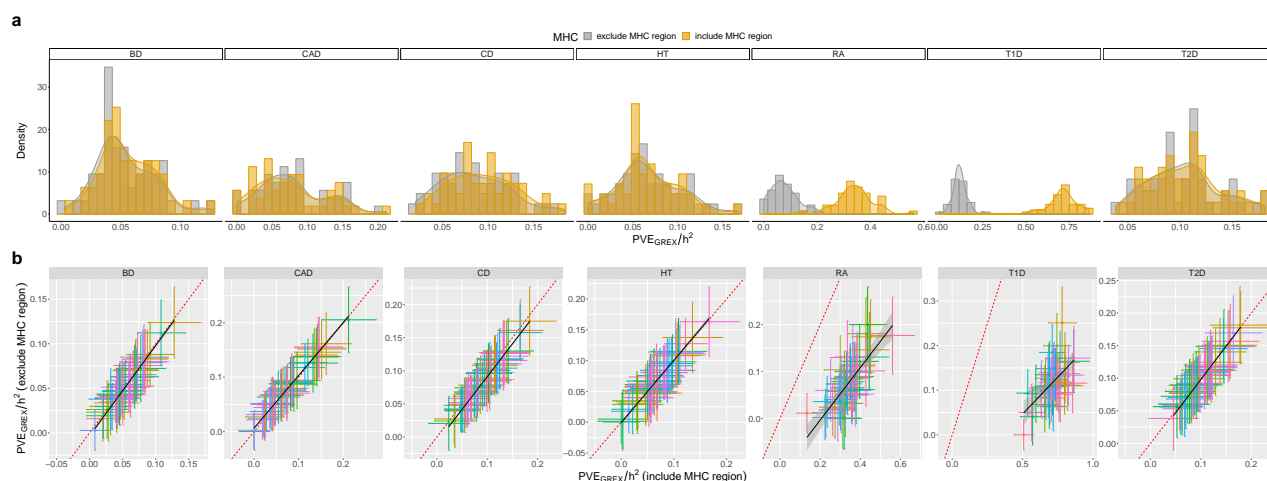

Figure 3: Percentage of heritability explained by GREX ( $PVE_{GREX}/h^2$ ) of the seven traits from WTCCC data. (a) The distributions of estimated  $PVE_{GREX}/h^2$  across 48 GTEx tissues. (b) Tissue-specific comparisons of  $PVE_{GREX}/h^2$  estimated by whole genome with those estimated by excluding the MHC region.

229 **Analysis results using the summary-level GWAS data.** Since the summary statistics  
 230 are much easier to access than the individual-level GWAS data, we are allowed to analyze  
 231 a wider spectrum of phenotypes using IGREX-s. To study the pattern of GREX impact in  
 232 multiple levels of human traits, we applied our method to proteins, metabolites as well as  
 233 high-level complex phenotypes such as schizophrenia, height and waist-to-hip ratio adjusted  
 234 BMI (WHRadjBMI). In the following analyses, we used the genotypes of 379 individuals of  
 235 European ancestry from the 1,000 genome project as the reference panel.

236 Firstly, we quantified  $PVE_{GREX}$  in the protein level using the summary statistics from  
 237 a plasma protein quantitative trait loci (pQTL) study [28]. Fig .4a shows the heritability  
 238 distributions of all 3,283 proteins in the dataset estimated using MQS [29]. Proteins with  
 239 insignificant heritabilities were excluded and 249 remained for inclusion in our analysis (See  
 240 Supplementray Table 3). The outcomes show that the heritabilities estimated by IGREX  
 241 ( $\hat{h}_t^2 = \widehat{PVE}_{GREX} + \widehat{PVE}_{Alternative}$ ) are strongly consistent to those estimated by MQS (See  
 242 Supplementary Fig. 10). The  $p$ -values for testing the significance of GREX effects on these  
 243 proteins are shown by the QQ-plot in Fig. 4b, where the tissues were categorized into 16 groups

(tissue-specific QQ-plots are given in Supplementary Fig. 11, Manhattan plot and heatmap of all tissue-protein pairs are given in Supplementary Figs. 12-13). As we can observe, the GREX components have significant contribution in many tissue-protein pairs. In particular, 9 out of 249 proteins have significant GREX components in at least one tissue at 0.05 level using Bonferroni correction. As illustrated in Fig. 4d-e, the contribution of GREX components shows heterogeneous across-tissue patterns in the nine proteins: CD96, DEFB119, MICB and PDE4D have high  $\widehat{\text{PVE}}_{\text{GREX}}$  regardless of the tissue type; on the other hand, significant GREX impacts for CFB, CXCL11, EVI2B, IDUA and LRPAP1 exist only in some subsets of tissues. We found that these tissue-specific patterns are consistent with the protein functions. For example, the CFB protein, which is implicated in the growth of preactivated B-lymphocytes, is found most associated with GREX in EBV-transformed lymphocytes ( $\widehat{\text{PVE}}_{\text{GREX}} = 18.7\%$ ); besides, the CXCL11 with its highest  $\widehat{\text{PVE}}_{\text{GREX}} = 16.6\%$  in pancreas is known to have a high expression level in pancreas. We also noted that 6 out of the 9 proteins were immune-related, suggesting that the genetics of immune process could be more related to gene regulation effects.

Besides the proteins, metabolic phenotypes also serve as an important intermediate for high level biological processes. To understand the role of gene regulation in the genetics of such traits, we applied IGREX-s to a summary level data set of circulating metabolites [30], which was comprised of meta-analysis of 123 metabolites. We focused our analysis on the 21 metabolites that were highly heritable (estimated  $h^2 > 10\%$ ) including glycine, various features of HDL, LDL, very low-density lipoprotein (VLDL) and intermediate-density lipoprotein (IDL) and other polyunsaturated fatty acids (otPUFA). The distributions of  $\text{PVE}_{\text{GREX}}/h^2$  estimates in different tissues are given in Fig. 5a. The median values of percentage estimates are higher than 10% in 6 out of the 48 tissues and only higher than 15% in liver and spinal cord (cervical c-1). According to the estimated values shown in the heat map of Fig. 5b, we can see that the features associated with IDL, LDL and VLDL have estimated  $\text{PVE}_{\text{GREX}}/h^2$  around 20% in liver and 16% in spinal cord, suggesting that they are more related to the GREX effects in these two tissues. On the contrary, there is no signal of GREX components detected under the nominal level 0.05 in any GTEx tissue for HDL associated features and glycine.

We also applied IGREX-s to the summary data of complex human traits. Here we analyzed schizophrenia (SCZ), height and WHRadjBMI. We considered four datasets of schizophrenia with increasing sample sizes: SCZ subset [31], SCZ1 [32], SCZ1+Sweden (SCZ1Swe)[33] and

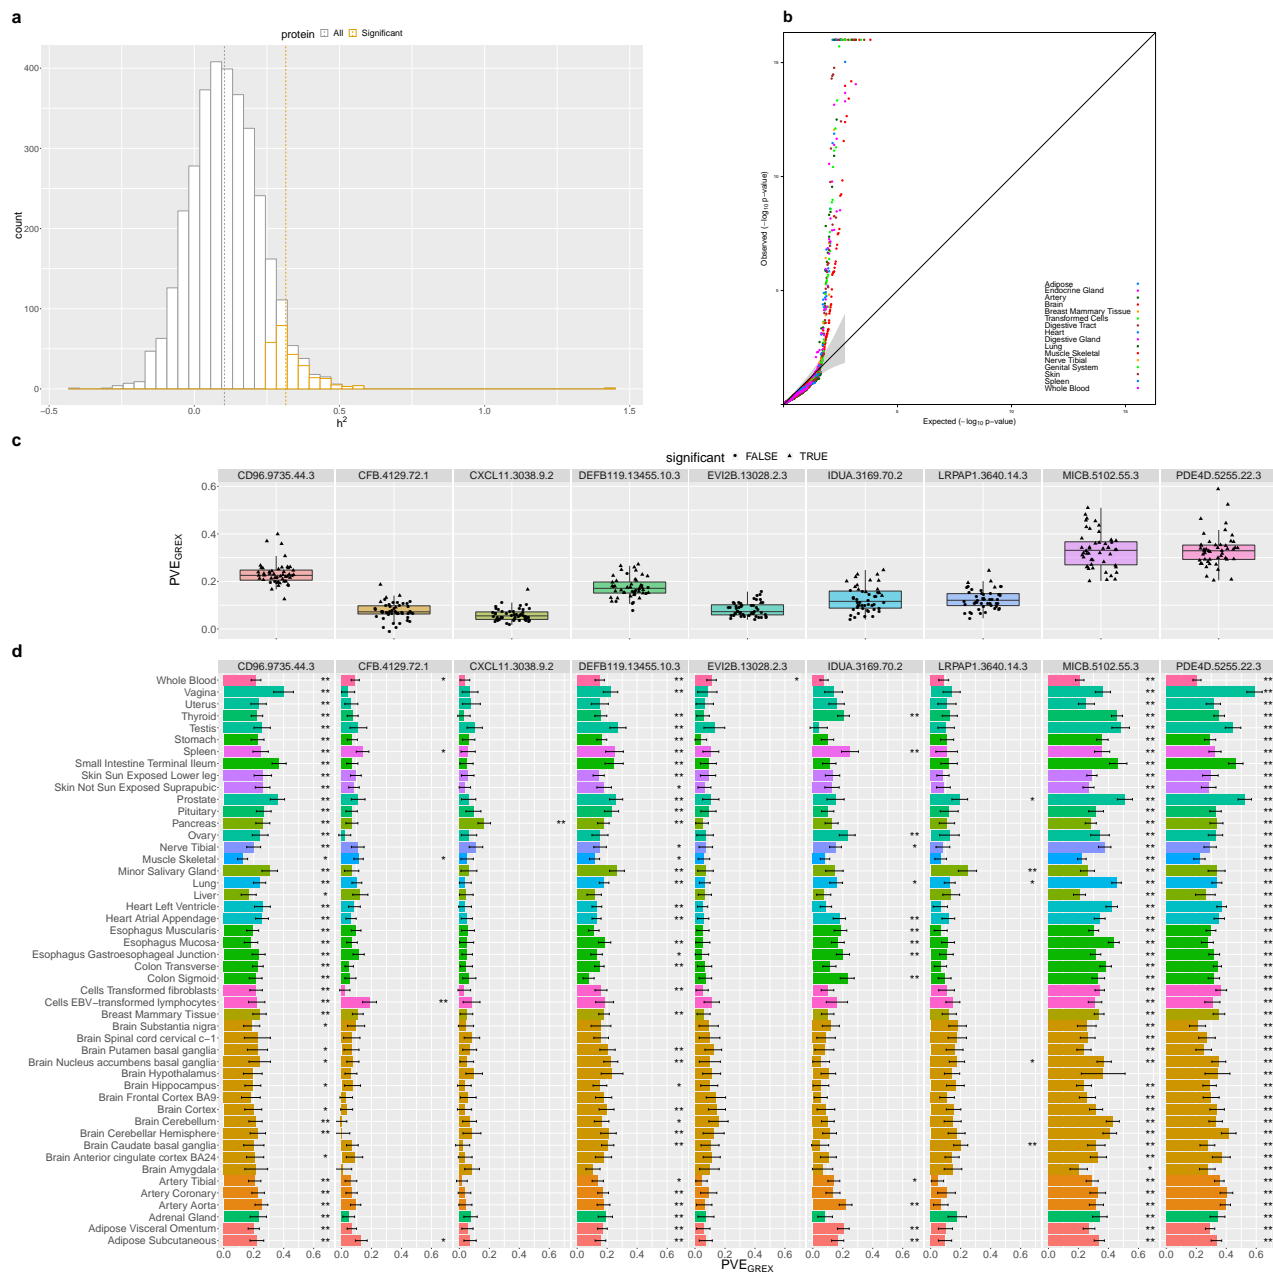

Figure 4: Analysis of plasma pQTL summary statistics. **(a)** The distribution of 3,283 proteins estimated using MQS. The whole study is colored in grey, while the 249 proteins with significant heritabilities are colored in yellow. Dashed lines represent the means of corresponding distributions. **(b)** QQ-plot of  $PVE_{GREX}$   $p$ -values of tissue-protein pairs. GTEx tissues are categorized into 16 types and colored accordingly. **(c)** The Manhattan plot of the protein encoding genes in aorta, cerebellum, liver and whole blood. Each point represents a tissue-protein pair. **(d)**  $\widehat{PVE}_{GREX}$  in the 9 proteins whose  $\widehat{PVE}_{GREX}$  are significant in at least one tissue at 0.05 level using Bonferroni correction. **(e)**  $\widehat{PVE}_{GREX}$  obtained by IGREX-s. Tissues are colored according to their categories. The number of asterisks represents the significance level:  $p\text{-value} < 0.05/48$  is annotated by \*;  $p\text{-value} < 0.05/(48 * 9)$  is annotated by \*\*.

275 SCZ2 [34]. We found that the estimated  $PVE_{GREX}/h^2$  in all four SCZ datasets have higher  
 276 values in brain than in other tissues (Fig. 6b), implying stronger GREX effects for SCZ in



287 noted the estimated percentages of heritability explained by GREX for all three complex traits  
 288 are less than 10% (6.7% for schizophrenia, 7.1% for height and 3.7% for WHRadjBMI in the  
 289 most expressed tissue. See Fig. 6c and Supplementary Fig. 15), lower than those of other  
 290 phenotypes. There are two possible reasons of this observation. First, IGREX only takes  
 291 account of the local genetic effects on gene expression due to the limited sample size of eQTL  
 292 studies. However, the gene regulation mechanisms of some complex traits may involve distant  
 293 SNPs, resulting in underestimated  $\widehat{PVE}_{GREX}$ . With a large eQTL sample size, this problem  
 294 can be addressed by accounting for the regulation effects across the whole genome. Second, the  
 295 genetic effects on gene expression may not be steady-state but rely on the biological status of  
 296 tissues and individuals. As GTEx data serve as a general-puposed reference, the dynamics of  
 297 genetically regulated gene expression may not be captured [37]. For example, the schizophrenia  
 298 patients may have different gene expression patterns and mechanisms from healthy individuals  
 299 in disease related tissues. Similarly, the genetic effects on gene expression associated with  
 300 height may vary between adult tissues and teenage tissues. In this scenario, condition-specific  
 301 gene expression data are demanded to provide more reliable estimates of  $PVE_{GREX}$ .

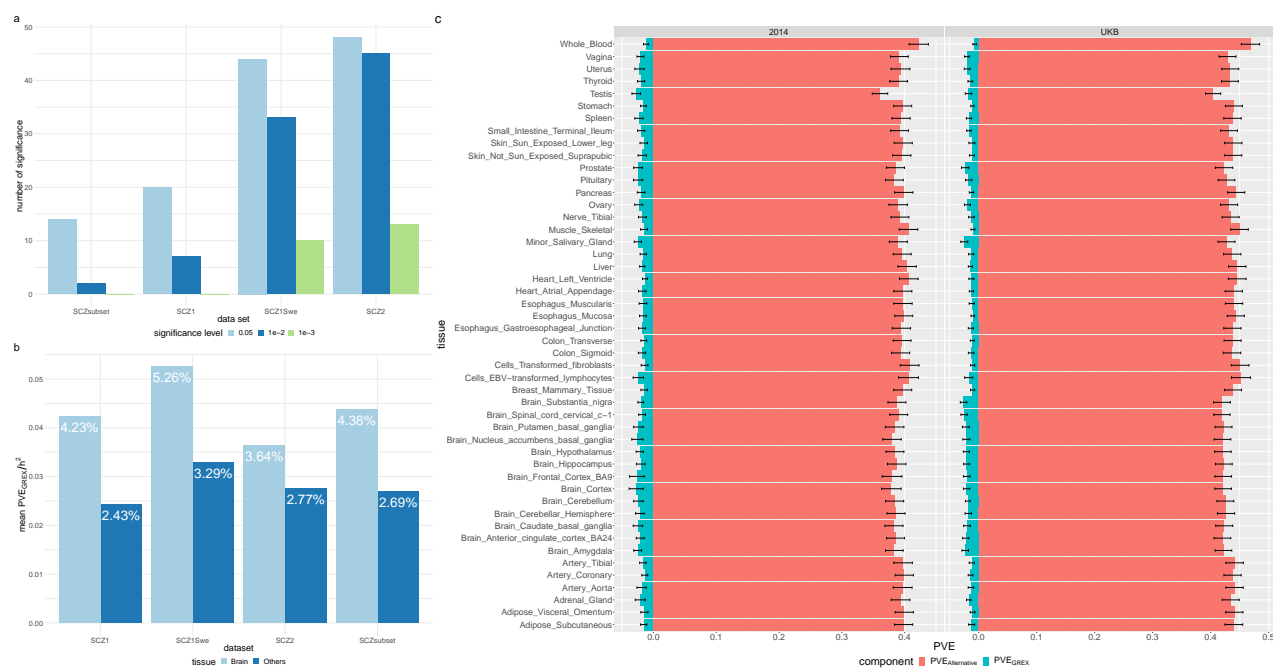

Figure 6: Analyses of complex traits: schizophrenia and height. (a) Number of significant GREX components revealed under different significance level for the four schizophrenia datasets. (b) Mean estimated percentages of heritability for schizophrenia explained by GREX in brain tissues and in other tissues. (c)  $\widehat{PVE}_{GREX}$  and  $\widehat{PVE}_{Alternative}$  of height estimated using height2014 and UKB datasets, respectively.

## 302 Discussion

303 Despite the great success of GWAS in the past 10 years, the biological basis of a large  
304 proportion of discovered genetic variants locating in the non-coding regions remains unknown.  
305 As cumulated evidence suggests the involvement of gene regulation mechanism for these genetic  
306 variants, there is a pressing need to characterize the role of gene regulation in the genetics of  
307 various phenotypes. By leveraging the general-purposed eQTL data (e.g. GTEx) with GWAS,  
308 our proposed method, IGREX, quantifies the impact of genetically regulated expression and  
309 provides new insights for the genetic architectures of extensive phenotypes.

310 IGREX is closely related to several existing methods such as TWAS [15], PrediXcan [14]  
311 and RhoGE [21]. Here we briefly discuss the relationship between IGREX and these methods.  
312 TWAS and PrediXcan can be considered within a more general MetaXcan framework that  
313 integrates eQTL information with GWAS results and identifies trait-associated genes. While  
314 both IGREX and MetaXcan ‘impute’ the gene expression based on eQTL reference, IGREX is  
315 distinct from MetaXcan in two perspectives:

- 316 • First, MetaXcan aims at identifying genes whose expressions are associated with pheno-  
317 types. In contrast, IGREX explores the impact of genetically regulated expression from a  
318 global perspective by quantifying the phenotypic variation that can be attributed to the  
319 GREX component.
- 320 • Second, while MetaXcan increases the power of gene-based association mapping by  
321 incorporating the eQTL information, the identified signals may not be totally attributed  
322 to GREX effects. In fact, when the signal from SNP to gene expression is weak, the  
323 posterior distribution of  $\beta_g$  will not change a lot from its prior (i.e.,  $\mu_g \approx \mathbf{0}$  and  
324  $\Sigma_g \approx \sigma_{\beta_g}^2 \mathbf{I}_{M_g}$ ). Consequently,  $\mathbf{X}_g(\mu_g \mu_g^T + \Sigma_g) \mathbf{X}_g^T$  and  $\mathbf{X}_g \mathbf{X}_g^T$  are numerically very close,  
325 resulting in a tagging effect between the two relatedness matrices. If the alternative  
326 genetic component is not adjusted for, the GREX effects can absorb the signals from  
327 the alternative genetic effects. This hampers MetaXcan from distinguishing the GREX  
328 effects and alternative genetic effects (See Supplementary Fig. 16). On the other hand,  
329 IGREX filters out the alternative genetic component by accounting for the alternative  
330 impact  $\mathbf{X}\gamma$  and captures the GREX signal only. This feature allows IGREX to produce  
331 results that are more biologically interpretable.



332 RhoGE is designed for identifying and estimating correlation between gene expression and trait.  
333 It also provides an LDSC-based approach for estimating  $PVE_{GREX}$ . Unlike IGREX, this method  
334 does not adjust for estimation uncertainty. Consequently, it significantly underestimates the  
335  $PVE_{GREX}$  when the signal is weak. In fact, RhoGE estimated the  $PVE_{GREX}$  for the majority  
336 of 1,350 tissue-trait pairs to be almost negligible (the first quantile, the median, and the  
337 third quantile are 0.00125%, 0.162% and 0.616%, respectively. See Table S9 of [21]). On  
338 the contrary, by accounting for the estimation uncertainty, IGREX can accurately estimate  
339  $PVE_{GREX}$  under weak signal. Through simulation studies, we have demonstrated that IGREX  
340 has better performance than RhoGE under various signal strengths.

341 A key assumption in applying IGREX to general-purposed eQTL data is the existence of  
342 steady-state component in GREX, i.e., the genetic effects on gene expression  $\beta_g$  should be the  
343 same in eQTL reference and GWAS data. However, there are situations where this assumption  
344 is violated. For example, it has been observed that more gene regulatory effects of CAD-risk  
345 SNPs are identified in the disease tissues than in the healthy GTEx tissues [37]. In the presence  
346 of this dynamic component, the  $\widehat{PVE}_{GREX}$  based on GTEx tissues may not be accurate enough,  
347 and substituting the gene expression reference by those derived from trait associated tissues is  
348 expected to produce better estimates.

349 In conclusion, we have presented a statistical approach, IGREX, that integrates GWAS  
350 data and eQTL reference to quantify the GREX impact in multiple levels of phenotypes. Not  
351 only does IGREX have better estimation accuracy than related methods, it also provides  
352 biological insights into the role of gene regulatory mechanisms in the genetics of various traits.  
353 Besides, IGREX enjoys a high practicality because it can be applied to both individual-level and  
354 summary-level GWAS data. We have successfully applied our method to both cellular level and  
355 organismal level traits and revealed cross-tissue and tissue-specific patterns of GREX in these  
356 traits. We have also applied IGREX to independent datasets of same traits, demonstrating the  
357 results given by our approach can be replicated.

## 358 Methods

359 **The IGREX-i for individual-level GWAS data.** First, let  $\mathcal{D}_r = \{\mathbf{Y}, \mathbf{X}_r\}$  denote the  
360 reference data set from some eQTL studies, where  $\mathbf{Y} \in \mathbb{R}^{n_r \times G}$  is the gene expression matrix,  
361  $\mathbf{X}_r \in \mathbb{R}^{n_r \times M}$  is the genotype matrix,  $n_r$  is the sample size of eQTL study,  $G$  is the number

362 of genes and  $M$  is the number of single-nucleotide polymorphisms (SNPs). Then, suppose  
 363 we have individual-level GWAS data set  $\mathcal{D}_i = \{\mathbf{t}, \mathbf{X}\}$  comprised of phenotype vector  $\mathbf{t} \in \mathbb{R}^n$   
 364 and genotype matrix  $\mathbf{X} \in \mathbb{R}^{n \times M}$ , where  $n$  is the GWAS sample size. For  $g = 1, \dots, G$ , we let  
 365  $g$ -th gene expression vector  $\mathbf{y}_g \in \mathbb{R}^{n_r}$  denote the corresponding column of  $\mathbf{Y}$ , local genotype  
 366 matrices  $\mathbf{X}_{r,g} \in \mathbb{R}^{n_r \times M_g}$  and  $\mathbf{X}_g \in \mathbb{R}^{n \times M_g}$  denote the corresponding  $M_g$  columns in  $\mathbf{X}_r$  and  
 367  $\mathbf{X}$ , respectively, where  $M_g$  is the number of local SNPs for  $g$ -th gene. To make the notation  
 368 uncluttered, we further assume that  $\mathbf{X}_{r,g}$  and  $\mathbf{X}_g$  have been standardized and both  $\mathbf{y}_g$  and  $\mathbf{t}$   
 369 have been properly adjusted for confounding factors. The complete model that accounts for  
 370 confounders is described in the supplementary. Now, we consider linear model (1) that links  
 371 the gene expression vector  $\mathbf{y}_g$  to  $\mathbf{X}_{r,g}$ :

$$\mathbf{y}_g = \mathbf{X}_{r,g}\boldsymbol{\beta}_g + \mathbf{e}_{r,g},$$

372 where  $\boldsymbol{\beta}_g$  is an  $M_g \times 1$  vector of genetic effects on the gene expression,  $\mathbf{e}_{r,g} \sim \mathcal{N}(0, \sigma_{r,g}^2 \mathbf{I}_{n_r})$  is  
 373 a vector of independent noise and  $\mathbf{I}$  is the identity matrix with the subscript being its size.  
 374 Assuming that there is a steady-state component in gene expression regulated by genetic variants,  
 375 individuals in  $\mathcal{D}_r$  and  $\mathcal{D}_i$  share the same  $\boldsymbol{\beta}_g$ . Hence, the genetically regulated expression (GREX)  
 376 in  $\mathcal{D}_i$  can be evaluated by  $\mathbf{X}_g\boldsymbol{\beta}_g$ . Then we assume that the phenotype  $\mathbf{t}$  can be decomposed into  
 377 two parts, i.e., the genetic effects through GREX and the genetic effects through alternative  
 378 ways, as in model (2):

$$\mathbf{t} = \sum_{g=1}^G \alpha_g \mathbf{X}_g \boldsymbol{\beta}_g + \mathbf{X}\boldsymbol{\gamma} + \boldsymbol{\epsilon},$$

379 where  $\alpha_g$  is the effect of  $\mathbf{X}_g\boldsymbol{\beta}_g$  on  $\mathbf{t}$ ,  $\boldsymbol{\gamma}$  is an  $n \times 1$  vector of alternative genetic effects and  
 380  $\boldsymbol{\epsilon} \sim \mathcal{N}(0, \sigma_\epsilon^2 \mathbf{I}_n)$  is a vector of independent errors. The term  $\sum_{g=1}^G \alpha_g \mathbf{X}_g \boldsymbol{\beta}_g$  can be viewed as the  
 381 over-all impact of GREX on the phenotype and  $\mathbf{X}\boldsymbol{\gamma}$  represents the alternative impact. Given a  
 382 genotype vector  $\mathbf{x} \in \mathbb{R}^M$  and a phenotype  $t \in \mathbb{R}$ , the impact of GREX can be quantified by the  
 383 proportion of variance explained by the GREX component:

$$\text{PVE}_{\text{GREX}} = \frac{\text{Var}(\sum_{g=1}^G \alpha_g \mathbf{x}_g^T \boldsymbol{\beta}_g)}{\text{Var}(t)}, \quad (3)$$

384 where  $\mathbf{x}_g$  is the genotype vector corresponding to the  $g$ -th gene.

385 To estimate  $\text{PVE}_{\text{GREX}}$ , we introduce the following probabilistic structure for the effects in  
 386 model (1) and (2):

$$\boldsymbol{\beta}_g \sim \mathcal{N}(\mathbf{0}, \sigma_{\beta_g}^2 \mathbf{I}_{M_g}), \quad \alpha_g \sim \mathcal{N}(\mathbf{0}, \sigma_\alpha^2), \quad \boldsymbol{\gamma} \sim \mathcal{N}(\mathbf{0}, \sigma_\gamma^2 \mathbf{I}_M), \quad (4)$$

387 which is motivated by a recent theoretical justification [38] for heritability estimation on  
 388 mis-specified linear mixed model (LMM). This prior specification in (4) provides a great com-  
 389 putational advantage as well as a stable performance for IGREX under model mis-specification,  
 390 as demonstrated in the simulation study.

391 The proposed method for individual-level GWAS data, IGREX-i, provides a two-stage  
 392 framework for estimating  $\text{PVE}_{\text{GREX}}$ . At the first stage, we estimate the parameters  $\sigma_{\beta_g}^2$  and  $\sigma_{r,g}^2$   
 393 in model (1) by a fast expectation-maximization (EM)-type algorithm, the parameter-expanded  
 394 EM (PX-EM) algorithm [39]. Based on the estimates, denoted as  $\hat{\sigma}_{\beta_g}^2$  and  $\hat{\sigma}_{r,g}^2$ , the posterior  
 395 distribution of  $\beta_g$  is given by

$$\beta_g | \mathbf{y}_g, \mathbf{X}_{r,g} \sim \mathcal{N}(\boldsymbol{\mu}_g, \boldsymbol{\Sigma}_g), \text{ where } \boldsymbol{\Sigma}_g = \left( \frac{1}{\hat{\sigma}_{r,g}^2} \mathbf{X}_{r,g}^T \mathbf{X}_{r,g} + \frac{1}{\hat{\sigma}_{\beta_g}^2} \mathbf{I}_{M_g} \right)^{-1}, \boldsymbol{\mu}_g = \boldsymbol{\Sigma}_g \frac{1}{\hat{\sigma}_{r,g}^2} \mathbf{X}_{r,g}^T \mathbf{y}_g. \quad (5)$$

396 At the second stage, we treat the posterior distribution obtained in (5) as the prior distribution  
 397 of  $\beta_g$  in model (2). This substitution naturally accounts for the uncertainty associated with  $\beta_g$   
 398 captured by  $\boldsymbol{\Sigma}_g$ . To evaluate the covariance of  $\mathbf{t}$ , we first note that  $\mathbb{E}(\mathbf{t} | \boldsymbol{\alpha}) = \sum_{g=1}^G \alpha_g \mathbf{X}_g \boldsymbol{\mu}_g$   
 399 and  $\text{Cov}(\mathbf{t} | \boldsymbol{\alpha}) = \sum_{g=1}^G \alpha_g^2 \mathbf{X}_g \boldsymbol{\Sigma}_g \mathbf{X}_g^T + \sigma_\gamma^2 \mathbf{X}_g \mathbf{X}_g^T + \sigma_\epsilon^2 \mathbf{I}_n$ ; then, using the law of total expectation  
 400 and total variance, we obtain  $\mathbb{E}(\mathbf{t}) = \mathbb{E}(\mathbb{E}(\mathbf{t} | \boldsymbol{\alpha})) = \mathbf{0}$  and

$$\text{Cov}(\mathbf{t}) = \text{Cov}(\mathbb{E}(\mathbf{t} | \boldsymbol{\alpha})) + \mathbb{E}(\text{Cov}(\mathbf{t} | \boldsymbol{\alpha})) = \sum_{g=1}^G \sigma_\alpha^2 \mathbf{X}_g (\boldsymbol{\mu}_g \boldsymbol{\mu}_g^T + \boldsymbol{\Sigma}_g) \mathbf{X}_g^T + \sigma_\gamma^2 \mathbf{X}_g \mathbf{X}_g^T + \sigma_\epsilon^2 \mathbf{I}_n, \quad (6)$$

401 respectively. By observing the form of (6), it is clear that the  $i$ -th diagonal element of  
 402  $\sum_{g=1}^G \sigma_\alpha^2 \mathbf{X}_g (\boldsymbol{\mu}_g \boldsymbol{\mu}_g^T + \boldsymbol{\Sigma}_g) \mathbf{X}_g^T$  and  $\sigma_\gamma^2 \mathbf{X}_g \mathbf{X}_g^T$  represents the variance explained by GREX and  
 403 alternative genetic effects, respectively. Therefore, the  $\text{PVE}_{\text{GREX}}$  defined in (3) can be estimated  
 404 by

$$\widehat{\text{PVE}}_{\text{GREX}} = \frac{\text{tr}(\sum_{g=1}^G \hat{\sigma}_\alpha^2 \mathbf{X}_g (\boldsymbol{\mu}_g \boldsymbol{\mu}_g^T + \boldsymbol{\Sigma}_g) \mathbf{X}_g^T)}{\text{tr}(\sum_{g=1}^G \hat{\sigma}_\alpha^2 \mathbf{X}_g (\boldsymbol{\mu}_g \boldsymbol{\mu}_g^T + \boldsymbol{\Sigma}_g) \mathbf{X}_g^T + \hat{\sigma}_\gamma^2 \mathbf{X}_g \mathbf{X}_g^T + \hat{\sigma}_\epsilon^2 \mathbf{I}_n)}, \quad (7)$$

405 where  $\hat{\sigma}_\alpha^2$ ,  $\hat{\sigma}_\gamma^2$  and  $\hat{\sigma}_\epsilon^2$  are the estimated values of  $\sigma_\alpha^2$ ,  $\sigma_\gamma^2$  and  $\sigma_\epsilon^2$ , respectively.

406 IGREX-i provides two approaches for estimating the parameters and  $\widehat{\text{PVE}}_{\text{GREX}}$  at the  
 407 second stage. Let  $\boldsymbol{\psi} = [\sigma_\alpha^2, \sigma_\gamma^2, \sigma_\epsilon^2]^T$  be the vector of parameters to be estimated,  $\mathbf{K}_\alpha =$   
 408  $\sum_{g=1}^G \mathbf{X}_g (\boldsymbol{\mu}_g \boldsymbol{\mu}_g^T + \boldsymbol{\Sigma}_g) \mathbf{X}_g^T$  and  $\mathbf{K}_\gamma = \mathbf{X}_g \mathbf{X}_g^T$ . The first method is based on the method of moments  
 409 (MoM), which minizes the distance between the second moment of  $\mathbf{t}$  at the population level and  
 410 that at the sample level  $f(\boldsymbol{\psi}) = \|\mathbf{t} \mathbf{t}^T - (\sigma_\alpha^2 \mathbf{K}_\alpha + \sigma_\gamma^2 \mathbf{K}_\gamma + \sigma_\epsilon^2 \mathbf{I}_n)\|^2$ . Let  $\frac{\partial f(\boldsymbol{\psi})}{\partial \sigma_\alpha^2} = \frac{\partial f(\boldsymbol{\psi})}{\partial \sigma_\gamma^2} = \frac{\partial f(\boldsymbol{\psi})}{\partial \sigma_\epsilon^2} = 0$ ,  
 411 we obtain the estimating equation

$$\mathbf{S} \boldsymbol{\psi} = \mathbf{q}, \quad (8)$$

412

$$\text{with } \mathbf{S} = \begin{bmatrix} \text{tr}(\mathbf{K}_\alpha^2) & \text{tr}(\mathbf{K}_\alpha \mathbf{K}_\gamma) & \text{tr}(\mathbf{K}_\alpha) \\ \text{tr}(\mathbf{K}_\alpha \mathbf{K}_\gamma) & \text{tr}(\mathbf{K}_\gamma^2) & \text{tr}(\mathbf{K}_\gamma) \\ \text{tr}(\mathbf{K}_\alpha) & \text{tr}(\mathbf{K}_\gamma) & n \end{bmatrix}, \boldsymbol{\psi} = \begin{bmatrix} \sigma_\alpha^2 \\ \sigma_\gamma^2 \\ \sigma_\epsilon^2 \end{bmatrix}, \mathbf{q} = \begin{bmatrix} \mathbf{t}^T \mathbf{K}_\alpha \mathbf{t} \\ \mathbf{t}^T \mathbf{K}_\gamma \mathbf{t} \\ \mathbf{t}^T \mathbf{t} \end{bmatrix}.$$

413 The solution of Equation (8) is given by  $\hat{\boldsymbol{\psi}} = \mathbf{S}^{-1} \mathbf{q}$ . And  $\text{Cov}(\hat{\boldsymbol{\psi}}) = \mathbf{S}^{-1} \text{Cov}(\mathbf{q}) \mathbf{S}^{-1}$  by  
 414 sandwich estimator. Then, the standard error of  $\widehat{\text{PVE}}_{\text{GREX}}$  can be obtained by delta method  
 415 (Supplementary). The second method applies the restricted maximum likelihood (REML) by  
 416 further assuming the normal distribution of  $\mathbf{t}$ :  $\mathbf{t} \sim \mathcal{N}(\mathbf{0}, \sigma_\alpha^2 \mathbf{K}_\alpha + \sigma_\gamma^2 \mathbf{K}_\gamma + \sigma_\epsilon^2 \mathbf{I}_n)$ . The variance  
 417 components are estimated by Minorization-Maximization (MM) algorithm [40].

418 **The IGREX-s for summary-level GWAS data.** The special formulation of method of  
 419 moments allows IGREX to be extended (IGREX-s) to handle summary-level GWAS data (i.e.  
 420  $z$ -scores) when the individual-level data  $\mathcal{D}_i$  is not available. Suppose we only have the  $z$ -scores  
 421 from summary-level GWAS data  $\{z_j\}_{j=1}^M$  generated from  $\mathcal{D}_i$ . The definition of the  $z$ -score is  
 422  $z_j = \frac{(\mathbf{x}_j^T \mathbf{x}_j)^{-1} \mathbf{x}_j^T \mathbf{t}}{\sqrt{\hat{\sigma}_j^2 (\mathbf{x}_j^T \mathbf{x}_j)^{-1}}}$ , where  $\mathbf{x}_j$  is the  $j$ -th column of  $\mathbf{X}$  and  $\hat{\sigma}_j^2$  is the estimate of residual variance  
 423 by regressing  $\mathbf{x}_j$  on  $\mathbf{t}$ . By assuming that  $z$ -scores are calculated from a standardized genotype  
 424 matrix  $\mathbf{X}$ , we have  $\mathbf{x}_j^T \mathbf{x}_j = n$ . Besides, the polygenicity assumption implies that  $\hat{\sigma}_j^2 \approx \hat{\sigma}_t^2$ , where  
 425  $\hat{\sigma}_t^2$  is the estimate of  $\text{Var}(t)$ . Hence, we have

$$z_j \approx \frac{\mathbf{x}_j^T \mathbf{t}}{\sqrt{n \hat{\sigma}_t^2}}, \quad (9)$$

426 and  $\text{PVE}_{\text{GREX}}$  defined in (3) can be estimated by

$$\widehat{\text{PVE}}_{\text{GREX}} = \frac{\frac{1}{n} \text{tr}(\sum_{g=1}^G \hat{\sigma}_\alpha^2 \mathbf{X}_g (\boldsymbol{\mu}_g \boldsymbol{\mu}_g^T + \boldsymbol{\Sigma}_g) \mathbf{X}_g^T)}{\hat{\sigma}_t^2} \approx \frac{\hat{\sigma}_\alpha^2}{\hat{\sigma}_t^2} \text{tr}(\sum_{g=1}^G (\boldsymbol{\mu}_g \boldsymbol{\mu}_g^T + \boldsymbol{\Sigma}_g) \hat{\mathbf{R}}_g), \quad (10)$$

427 where  $\hat{\mathbf{R}}_g = \tilde{\mathbf{X}}_g^T \tilde{\mathbf{X}}_g / m$  is the estimated LD matrix associated with the  $g$ -th gene and  $\tilde{\mathbf{X}}_g$  is  
 428 the corresponding columns of some genotype matrix  $\tilde{\mathbf{X}}$ . In practice,  $\tilde{\mathbf{X}} \in \mathbb{R}^{m \times M}$  can be the  
 429 genotype matrix either from reference panel (e.g. eQTL studies such as GTEx) or the 1000  
 430 genome project. Now, we consider the method of moments in the estimating equation (8) to  
 431 obtain  $\frac{\hat{\sigma}_\alpha^2}{\hat{\sigma}_t^2}$ . By eliminating  $\sigma_\epsilon^2$  and dividing both sides by  $n^2$ , we have

$$\begin{bmatrix} \frac{\text{tr}(\mathbf{K}_\alpha^2) - \frac{\text{tr}^2(\mathbf{K}_\alpha)}{n}}{n^2} & \frac{\text{tr}(\mathbf{K}_\alpha \mathbf{K}_\gamma) - \frac{\text{tr}(\mathbf{K}_\alpha) \text{tr}(\mathbf{K}_\gamma)}{n}}{n^2} \\ \frac{\text{tr}(\mathbf{K}_\alpha \mathbf{K}_\gamma) - \frac{\text{tr}(\mathbf{K}_\alpha) \text{tr}(\mathbf{K}_\gamma)}{n}}{n^2} & \frac{\text{tr}(\mathbf{K}_\gamma^2) - \frac{\text{tr}^2(\mathbf{K}_\gamma)}{n}}{n^2} \end{bmatrix} \begin{bmatrix} \sigma_\alpha^2 \\ \sigma_\gamma^2 \end{bmatrix} = \begin{bmatrix} \frac{1}{n^2} \mathbf{t}^T \mathbf{K}_\alpha \mathbf{t} - \frac{\text{tr}(\mathbf{K}_\alpha)}{n^3} \mathbf{t}^T \mathbf{t} \\ \frac{1}{n^2} \mathbf{t}^T \mathbf{K}_\gamma \mathbf{t} - \frac{\text{tr}(\mathbf{K}_\gamma)}{n^3} \mathbf{t}^T \mathbf{t} \end{bmatrix}. \quad (11)$$

432 The terms on the left hand side does not involve  $\mathbf{t}$  and thus can be approximated using  
 433  $\tilde{\mathbf{X}}$  [29]. For example,  $\frac{\text{tr}(\mathbf{K}_\alpha^2) - \frac{\text{tr}^2(\mathbf{K}_\alpha)}{n}}{n^2}$  can be well approximated by  $\frac{\text{tr}(\tilde{\mathbf{K}}_\alpha^2) - \frac{\text{tr}^2(\tilde{\mathbf{K}}_\alpha)}{m}}{m^2}$ , where  $\tilde{\mathbf{K}}_\alpha =$

434  $\sum_{g=1}^G \tilde{\mathbf{X}}_g (\boldsymbol{\mu}_g \boldsymbol{\mu}_g^T + \boldsymbol{\Sigma}_g) \tilde{\mathbf{X}}_g^T$ . Other terms on the left hand side can be approximated in the same  
 435 way. For the right hand side, each term can be approximated using  $\hat{\mathbf{R}}_g$  and  $z$ -scores from  
 436 approximation (9):  $\mathbf{t}^T \mathbf{K}_\alpha \mathbf{t} \approx n \hat{\sigma}_t^2 \sum_g \mathbf{z}_g^T (\boldsymbol{\mu}_g \boldsymbol{\mu}_g^T + \boldsymbol{\Sigma}_g) \mathbf{z}_g$ , where  $\mathbf{z}_g \in \mathbb{R}^{M_g}$  is the vector of  $z$ -scores  
 437 corresponding to the  $g$ -th gene;  $\frac{\text{tr}(\mathbf{K}_\alpha)}{n} \mathbf{t}^T \mathbf{t} \approx n \hat{\sigma}_t^2 \text{tr}(\sum_g (\boldsymbol{\mu}_g \boldsymbol{\mu}_g^T + \boldsymbol{\Sigma}_g) \hat{\mathbf{R}}_g)$ ;  $\mathbf{t}^T \mathbf{K}_\gamma \mathbf{t} \approx n \hat{\sigma}_t^2 \sum_{j=1}^M z_j^2$ ;  
 438 and  $\frac{\text{tr}(\mathbf{K}_\gamma)}{n} \mathbf{t}^T \mathbf{t} \approx n \hat{\sigma}_t^2$ . With these approximations, Equation (11) becomes

$$\begin{bmatrix} \frac{\text{tr}(\tilde{\mathbf{K}}_\alpha^2) - \frac{\text{tr}^2(\tilde{\mathbf{K}}_\alpha)}{m}}{m^2} & \frac{\text{tr}(\tilde{\mathbf{K}}_\alpha \tilde{\mathbf{K}}_\gamma) - \frac{\text{tr}(\tilde{\mathbf{K}}_\alpha) \text{tr}(\tilde{\mathbf{K}}_\gamma)}{m}}{m^2} \\ \frac{\text{tr}(\tilde{\mathbf{K}}_\alpha \tilde{\mathbf{K}}_\gamma) - \frac{\text{tr}(\tilde{\mathbf{K}}_\alpha) \text{tr}(\tilde{\mathbf{K}}_\gamma)}{m}}{m^2} & \frac{\text{tr}(\tilde{\mathbf{K}}_\gamma^2) - \frac{\text{tr}^2(\tilde{\mathbf{K}}_\gamma)}{m}}{m^2} \end{bmatrix} \begin{bmatrix} \hat{\sigma}_\alpha^2 \\ \hat{\sigma}_\gamma^2 \\ \hat{\sigma}_t^2 \end{bmatrix} = \begin{bmatrix} \frac{\sum_g \mathbf{z}_g^T (\boldsymbol{\mu}_g \boldsymbol{\mu}_g^T + \boldsymbol{\Sigma}_g) \mathbf{z}_g - \text{tr}(\sum_g (\boldsymbol{\mu}_g \boldsymbol{\mu}_g^T + \boldsymbol{\Sigma}_g) \hat{\mathbf{R}}_g)}{\sum_{j=1}^M \frac{z_j^2 - 1}{n}} \end{bmatrix}.$$

439 Then,  $\frac{\hat{\sigma}_\alpha^2}{\hat{\sigma}_t^2}$  can be obtained by solving this equation. Plugging this estimate into Equation (10)  
 440 gives the  $\widehat{\text{PVE}}_{\text{GREX}}$ . The standard errors of  $\widehat{\text{PVE}}_{\text{GREX}}$  can be estimated by block jackknife  
 441 (Supplementary).

442 IGREX can incorporate fixed effects to adjust possible confounding factors, such as popula-  
 443 tion structure. Details are provided in the Supplementary Note.

444 **GTE<sub>x</sub> eQTL dataset.** We used the gene expression data from the V7 release of GTE<sub>x</sub>  
 445 Consortium as our reference dataset. This data is comprised of 48 tissues collected from 620  
 446 donors with total sample size 10,294. The sample size of each tissue ranges from 80 to 491  
 447 (details provided in Supplementary Table 4). We set the mappability cutoff at 0.9 to filter gene  
 448 expressions, leaving 16,333 ~ 27,378 genes for inclusion in our analysis. The genotype data  
 449 were obtained from the third phase of the International HapMap project phase 3 (HapMap3)  
 450 with 1,189,556 genotyped SNPs. For each gene, we included only the SNPs within 500kb of  
 451 the transcription start and end of each protein coding genes. In real data analysis, we used  
 452 the covariates provided by the GTE<sub>x</sub> consortium, including top 3 principal components (PC),  
 453 Probabilistic Estimation of Expression Residuals (PEER) factors, genotyping platform and sex  
 454 (as described in <https://gtexportal.org/home/documentationPage>).

455 **Individual level GWAS datasets.** The NFBC dataset is comprised of 5,402 individuals  
 456 with ten continuous phenotypes related to cardiovascular diseases including body mass index  
 457 (BMI), C-reactive protein (CRP), insulin, high-density lipoprotein cholesterol (HDL), low-  
 458 density lipoprotein cholesterol (LDL), triglycerides (TG), total cholesterol (TC), diastolic blood  
 459 pressure (DiaBP) and systolic blood pressure (SysBP). There are 364,590 genotyped SNPs in  
 460 this dataset. The individuals with contradictory in reported sex and sex determined from the  
 461 X chromosome were first excluded. We then excluded the SNPs with minor allele frequency

462 less than 1%, with missing values in more than 1% of the individuals or with Hardy-Weinberg  
463 equilibrium (HWE)  $p$ -value below 0.0001. This quality control process yields 5,123 individuals  
464 with 319,147 SNPs in NFBC dataset for our analysis. We evaluated the genetic relatedness  
465 matrix (GRM) using the processed genotype data and selected the top 20 PCs as covariates in  
466 the study.

467 The WTCCC dataset contains seven disease phenotypes including bipolar disorder (BD)  
468 with , coronary artery disease (CAD), Crohn's disease (CD), hypertension (HT), rheumatoid  
469 arthritis (RA), type 1 diabetes (T1D) and type 2 diabetes (T2D). It includes around 2,000  
470 cases and 3,004 controls with 490,032 genotyped SNPs. We first removed the individuals  
471 with genotyping rate less than 5%. Then we excluded the SNPs satisfying at least one of  
472 the following: minor allele frequency is less than 5%; genotypes are missed in more than 1%  
473 samples; HWE  $p$ -value is below 0.001. We also removed the individuals with estimated genetic  
474 correlation larger than 2.5%. After quality control, around 4,700 individuals with 300,000  
475 SNPs were remained for further analysis (See Supplementary Table 1). Based on the obtained  
476 data, we calculated the GRM and extracted top 20 PCs as covariates included in our study.

477 **GWAS summary statistics.** We analyzed ten summary level GWAS datasets: human plasma  
478 pQTL data [28], circulating metabolite data [30], four schizophrenia datasets [31, 32, 33, 34], two  
479 independent height datasets [35] and European ancestry of WHRadjBMI datasets separated by  
480 men and women [36]. The SNPs with missing information (i.e. chromosome, minor allele, allele  
481 frequency) were first removed. Following the practice of LDSC [24], we checked the  $\chi^2$  statistic  
482 of each SNP and excluded those with extreme values ( $\chi^2 > 80$ ) to prevent dominant effect. The  
483 detailed information is provided in Supplementary Table 2. After preprocess, the remaining  
484 SNPs were further matched with reference data during analysis, which is automatically processed  
485 using our IGREX software.

486 **Software.** Our software IGREX is publicly available on GitHub repository: <https://github.com/mxcai/iGREX>.

488 **Data availability.** The GTEx gene expression data was downloaded from GTEx Consor-  
489 tium website <https://gtexportal.org/home/datasets>. The HapMap3 genotype data is  
490 available at <ftp://ftp.ncbi.nlm.nih.gov/hapmap/>. The NFBC study was downloaded from  
491 dbGAP using accession number phs000276.v1.p1. The WTCCC data was obtained from its

492 consortium website [https://www.wtccc.org.uk/info/access\\_to\\_data\\_samples.html](https://www.wtccc.org.uk/info/access_to_data_samples.html). The  
493 GWAS summary statistics can be accessed using the links provided in Supplementary Table 2.

## 494 References

- 495 [1] Matthew T. Maurano, Richard Humbert, Eric Rynes, Robert E. Thurman, Eric Haugen,  
496 Hao Wang, Alex P. Reynolds, Richard Sandstrom, Hongzhu Qu, Jennifer Brody, Anthony  
497 Shafer, Fidencio Neri, Kristen Lee, Tanya Kutuyavin, Sandra Stehling-Sun, Audra K.  
498 Johnson, Theresa K. Canfield, Erika Giste, Morgan Diegel, Daniel Bates, R. Scott Hansen,  
499 Shane Neph, Peter J. Sabo, Shelly Heimfeld, Antony Raubitschek, Steven Ziegler, Chris  
500 Cotsapas, Nona Sotoodehnia, Ian Glass, Shamil R. Sunyaev, Rajinder Kaul, and John A.  
501 Stamatoyannopoulos. Systematic localization of common disease-associated variation in  
502 regulatory DNA. *Science*, 337(6099):1190–1195, 2012.
- 503 [2] William Cookson, Liming Liang, Gonçalo Abecasis, Miriam Moffatt, and Mark Lathrop.  
504 Mapping complex disease traits with global gene expression. *Nature Reviews Genetics*,  
505 10(3):184, 2009.
- 506 [3] Mark M Pomerantz, Nasim Ahmadiyeh, LI Jia, Paula Herman, Michael P Verzi, Har-  
507 shavardhan Doddapaneni, Christine A Beckwith, Jennifer A Chan, Adam Hills, Matt  
508 Davis, et al. The 8q24 cancer risk variant rs6983267 shows long-range interaction with  
509 myc in colorectal cancer. *Nature genetics*, 41(8):882, 2009.
- 510 [4] Kiran Musunuru, Alanna Strong, Maria Frank-Kamenetsky, Noemi E Lee, Tim Ahfeldt,  
511 Katherine V Sachs, Xiaoyu Li, Hui Li, Nicolas Kuperwasser, Vera M Ruda, et al. From non-  
512 coding variant to phenotype via sort1 at the 1p13 cholesterol locus. *Nature*, 466(7307):714,  
513 2010.
- 514 [5] Olivier Harismendy, Dimple Notani, Xiaoyuan Song, Nazli G Rahim, Bogdan Tanasa,  
515 Nathaniel Heintzman, Bing Ren, Xiang-Dong Fu, Eric J Topol, Michael G Rosenfeld, et al.  
516 9p21 dna variants associated with coronary artery disease impair interferon- $\gamma$  signalling  
517 response. *Nature*, 470(7333):264, 2011.
- 518 [6] Dan L Nicolae, Eric Gamazon, Wei Zhang, Shiwei Duan, M Eileen Dolan, and Nancy J  
519 Cox. Trait-associated SNPs are more likely to be eqtls: annotation to enhance discovery  
520 from gwas. *PLoS genetics*, 6(4):e1000888, 2010.
- 521 [7] Lucia A. Hindorff, Praveen Sethupathy, Heather A. Junkins, Erin M. Ramos, Jayashri P.



- 522 Mehta, Francis S. Collins, and Teri A. Manolio. Potential etiologic and functional implica-  
523 tions of genome-wide association loci for human diseases and traits. *Proceedings of the*  
524 *National Academy of Sciences*, 106(23):9362–9367, 2009.
- 525 [8] Frank W Albert and Leonid Kruglyak. The role of regulatory variation in complex traits  
526 and disease. *Nature Reviews Genetics*, 16(4):197, 2015.
- 527 [9] Eric R Gamazon, Ayellet V Segrè, Martijn van de Bunt, Xiaoquan Wen, Hualin S Xi,  
528 Farhad Hormozdiari, Halit Ongen, Anuar Konkashbaev, Eske M Derks, François Aguet,  
529 et al. Using an atlas of gene regulation across 44 human tissues to inform complex  
530 disease-and trait-associated variation. *Nature genetics*, 50(7):956, 2018.
- 531 [10] GTEx Consortium et al. Genetic effects on gene expression across human tissues. *Nature*,  
532 550(7675):204, 2017.
- 533 [11] Luke R Lloyd-Jones, Alexander Holloway, Allan McRae, Jian Yang, Kerrin Small, Jing  
534 Zhao, Biao Zeng, Andrew Bakshi, Andres Metspalu, Manolis Dermitzakis, et al. The  
535 genetic architecture of gene expression in peripheral blood. *The American Journal of*  
536 *Human Genetics*, 100(2):228–237, 2017.
- 537 [12] Harm-Jan Westra, Marjolein J Peters, Tõnu Esko, Hanieh Yaghootkar, Claudia Schurmann,  
538 Johannes Kettunen, Mark W Christiansen, Benjamin P Fairfax, Katharina Schramm,  
539 Joseph E Powell, et al. Systematic identification of trans eqtls as putative drivers of known  
540 disease associations. *Nature genetics*, 45(10):1238, 2013.
- 541 [13] Ting Qi, Yang Wu, Jian Zeng, Futao Zhang, Angli Xue, Longda Jiang, Zhihong Zhu,  
542 Kathryn Kemper, Loic Yengo, Zhili Zheng, et al. Identifying gene targets for brain-related  
543 traits using transcriptomic and methylomic data from blood. *Nature communications*, 9,  
544 2018.
- 545 [14] Eric R Gamazon, Heather E Wheeler, Kanaan P Shah, Sahar V Mozaffari, Keston Aquino-  
546 Michaels, Robert J Carroll, Anne E Eyler, Joshua C Denny, Dan L Nicolae, Nancy J Cox,  
547 et al. A gene-based association method for mapping traits using reference transcriptome  
548 data. *Nature genetics*, 47(9):1091, 2015.
- 549 [15] Alexander Gusev, Arthur Ko, Huwenbo Shi, Gaurav Bhatia, Wonil Chung, Brenda WJH  
550 Penninx, Rick Jansen, Eco JC De Geus, Dorret I Boomsma, Fred A Wright, et al.

- 551 Integrative approaches for large-scale transcriptome-wide association studies. *Nature*  
552 *genetics*, 48(3):245, 2016.
- 553 [16] Zhihong Zhu, Futao Zhang, Han Hu, Andrew Bakshi, Matthew R Robinson, Joseph E  
554 Powell, Grant W Montgomery, Michael E Goddard, Naomi R Wray, Peter M Visscher,  
555 et al. Integration of summary data from gwas and eqtl studies predicts complex trait gene  
556 targets. *Nature genetics*, 48(5):481, 2016.
- 557 [17] Nicholas Mancuso, Gleb Kichaev, Huwenbo Shi, Malika Freund, Claudia Giambartolomei,  
558 Alexander Gusev, and Bogdan Pasaniuc. Probabilistic fine-mapping of transcriptome-wide  
559 association studies. *bioRxiv*, page 236869, 2017.
- 560 [18] Kunal Bhutani, Abhishek Sarkar, Yongjin Park, Manolis Kellis, and Nicholas J Schork.  
561 Modeling prediction error improves power of transcriptome-wide association studies.  
562 *bioRxiv*, page 108316, 2017.
- 563 [19] Alvaro N Barbeira, Scott P Dickinson, Rodrigo Bonazzola, Jiamao Zheng, Heather E  
564 Wheeler, Jason M Torres, Eric S Torstenson, Kaanan P Shah, Tzintzuni Garcia, Todd L  
565 Edwards, et al. Exploring the phenotypic consequences of tissue specific gene expression  
566 variation inferred from gwas summary statistics. *Nature communications*, 9(1):1825, 2018.
- 567 [20] Can Yang, Xiang Wan, Xinyi Lin, Mengjie Chen, Xiang Zhou, and Jin Liu. Comm:  
568 a collaborative mixed model to dissecting genetic contributions to complex traits by  
569 leveraging regulatory information. *Bioinformatics*, page bty865, 2018.
- 570 [21] Nicholas Mancuso, Huwenbo Shi, Pagé Goddard, Gleb Kichaev, Alexander Gusev, and  
571 Bogdan Pasaniuc. Integrating gene expression with summary association statistics to  
572 identify genes associated with 30 complex traits. *The American Journal of Human Genetics*,  
573 100(3):473–487, 2017.
- 574 [22] Luke J O’Connor, Alexander Gusev, Xuanyao Liu, Po-Ru Loh, Hilary K Finucane, and  
575 Alkes L Price. Estimating the proportion of disease heritability mediated by gene expression  
576 levels. *BioRxiv*, page 118018, 2017.
- 577 [23] Daniel J Schaid, Wenan Chen, and Nicholas B Larson. From genome-wide associations to  
578 candidate causal variants by statistical fine-mapping. *Nature reviews. Genetics*, 2018.

- 579 [24] Brendan K Bulik-Sullivan, Po-Ru Loh, Hilary K Finucane, Stephan Ripke, Jian Yang, Nick  
580 Patterson, Mark J Daly, Alkes L Price, Benjamin M Neale, Schizophrenia Working Group  
581 of the Psychiatric Genomics Consortium, et al. Ld score regression distinguishes con-  
582 founding from polygenicity in genome-wide association studies. *Nature genetics*, 47(3):291,  
583 2015.
- 584 [25] Chiara Sabatti, Anna-Liisa Hartikainen, Anneli Pouta, Samuli Ripatti, Jae Brodsky,  
585 Chris G Jones, Noah A Zaitlen, Teppo Varilo, Marika Kaakinen, Ulla Sovio, et al. Genome-  
586 wide association analysis of metabolic traits in a birth cohort from a founder population.  
587 *Nature genetics*, 41(1):35, 2009.
- 588 [26] Wellcome Trust Case Control Consortium et al. Genome-wide association study of 14,000  
589 cases of seven common diseases and 3,000 shared controls. *Nature*, 447(7145):661, 2007.
- 590 [27] Tao Feng and Xiaofeng Zhu. Genome-wide searching of rare genetic variants in wtccc data.  
591 *Human genetics*, 128(3):269–280, 2010.
- 592 [28] Benjamin B Sun, Joseph C Maranville, James E Peters, David Stacey, James R Staley,  
593 James Blackshaw, Stephen Burgess, Tao Jiang, Ellie Paige, Praveen Surendran, et al.  
594 Genomic atlas of the human plasma proteome. *Nature*, 558(7708):73, 2018.
- 595 [29] Xiang Zhou. A unified framework for variance component estimation with summary  
596 statistics in genome-wide association studies. *The annals of applied statistics*, 11(4):2027,  
597 2017.
- 598 [30] Johannes Kettunen, Ayşe Demirkan, Peter Würtz, Harmen HM Draisma, Toomas Haller,  
599 Rajesh Rawal, Anika Vaarhorst, Antti J Kangas, Leo-Pekka Lyytikäinen, Matti Pirinen,  
600 et al. Genome-wide study for circulating metabolites identifies 62 loci and reveals novel  
601 systemic effects of lpa. *Nature communications*, 7:11122, 2016.
- 602 [31] JW Smoller. Cross disorder group of the psychiatric genomics consortium. identification  
603 of risk loci with shared effects on five major psychiatric disorders: a genome-wide analysis  
604 (vol 381, pg 1371, 2013). *Lancet*, 381(9875):1360–1360, 2013.
- 605 [32] S Ripke, AR Sanders, KS Kendler, DF Levinson, P Sklar, PA Holmans, DY Lin, J Duan,  
606 RA Ophoff, OA Andreassen, et al. Schizophrenia psychiatric genome-wide association

- 607 study (gwas) consortium genome-wide association study identifies five new schizophrenia  
608 loci. *Nature Genetics*, 43:969–976, 2011.
- 609 [33] Stephan Ripke, Colm O’Dushlaine, Kimberly Chambert, Jennifer L Moran, Anna K Kähler,  
610 Susanne Akterin, Sarah E Bergen, Ann L Collins, James J Crowley, Menachem Fromer,  
611 et al. Genome-wide association analysis identifies 13 new risk loci for schizophrenia. *Nature*  
612 *genetics*, 45(10):1150, 2013.
- 613 [34] Stephan Ripke, Benjamin M Neale, Aiden Corvin, James TR Walters, Kai-How Farh,  
614 Peter A Holmans, Phil Lee, Brendan Bulik-Sullivan, David A Collier, Hailiang Huang, et al.  
615 Biological insights from 108 schizophrenia-associated genetic loci. *Nature*, 511(7510):421,  
616 2014.
- 617 [35] Andrew R Wood, Tonu Esko, Jian Yang, Sailaja Vedantam, Tune H Pers, Stefan Gustafsson,  
618 Audrey Y Chu, Karol Estrada, Jian’an Luan, Zoltán Kutalik, et al. Defining the role  
619 of common variation in the genomic and biological architecture of adult human height.  
620 *Nature genetics*, 46(11):1173, 2014.
- 621 [36] Dmitry Shungin, Thomas W Winkler, Damien C Croteau-Chonka, Teresa Ferreira, Adam E  
622 Locke, Reedik Mägi, Rona J Strawbridge, Tune H Pers, Krista Fischer, Anne E Justice,  
623 et al. New genetic loci link adipose and insulin biology to body fat distribution. *Nature*,  
624 518(7538):187, 2015.
- 625 [37] Oscar Franzén, Raili Ermel, Ariella Cohain, Nicholas K Akers, Antonio Di Narzo, Husain A  
626 Talukdar, Hassan Foroughi-Asl, Claudia Giambartolomei, John F Fullard, Katyayani  
627 Sukhavasi, et al. Cardiometabolic risk loci share downstream cis-and trans-gene regulation  
628 across tissues and diseases. *Science*, 353(6301):827–830, 2016.
- 629 [38] Jiming Jiang, Cong Li, Debashis Paul, Can Yang, Hongyu Zhao, et al. On high-dimensional  
630 misspecified mixed model analysis in genome-wide association study. *The Annals of*  
631 *Statistics*, 44(5):2127–2160, 2016.
- 632 [39] Chuanhai Liu, Donald B Rubin, and Ying Nian Wu. Parameter expansion to accelerate  
633 em: the px-em algorithm. *Biometrika*, 85(4):755–770, 1998.
- 634 [40] Hua Zhou, Liuyi Hu, Jin Zhou, and Kenneth Lange. Mm algorithms for variance compo-  
635 nents models. *arXiv preprint arXiv:1509.07426*, 2015.
